# Supplementary material for: Investigation of HSA as a biocompatible coating material for arsenic trioxide nanoparticles
Source: Royal Society of Chemistry journal article supplement (doi:10.1039/c7nr09503a), 2018-01-01

## Electronic Supplementary Information

### Investigation of HSA as a biocompatible coating material for Arsenic Trioxide Nanoparticles

Maneka Hoonjan<sup>1a</sup>, Geetanjali Sachdeva<sup>2</sup>, Sudeshna Chandra<sup>1b</sup>, Prashant S Kharkhar<sup>3</sup>, Niteshkumar Sahu<sup>3</sup>, Purvi Bhatt<sup>1a\*</sup>

<sup>1a</sup> Department of Biological Sciences, Sunandan Divatia School of Science, SVKM's NMIMS (Deemed-to-be University), Vile Parle (West), Mumbai 400056, India.

<sup>2</sup> Primate Biology Department, National Institute for Research in Reproductive Health (NIRRH), Parel, Mumbai 400012, India

<sup>1b</sup> Department of Chemistry, Sunandan Divatia School of Science, SVKM's NMIMS (Deemed-to-be University), Vile Parle (West), Mumbai 400056, India.

<sup>3</sup> Department of Pharmaceutical Chemistry, Shobhaben Pratapbhai Patel School of Pharmacy and Technology Management, SVKM's NMIMS (Deemed-to-be University), Vile Parle (W), Mumbai 400056, India

<sup>1a\*</sup> **Corresponding Author:** Dr. Purvi Bhatt, Department of Biological Sciences, Sunandan Divatia School of Science, SVKM's NMIMS (Deemed-to-be University), Vile Parle (West), Mumbai 400056, India. Email: purvi.bhatt@nmims.edu ; Fax: +91-22-26114512; Tel: +91-22-42355956.

## Supplementary Section

### Colloidal stability of HSA-As<sub>2</sub>O<sub>3</sub> NPs

The colloidal stability of HSA coated NPs was checked in phosphate buffered saline (PBS) for a week (more than the time period of cell culture study). The HSA-As<sub>2</sub>O<sub>3</sub> NPs were found to have colloidal stability for more than 1 week. The ‘+++’ indicates good colloidal stability.

| Concentration of HSA-As <sub>2</sub> O <sub>3</sub> NPs | 0hrs | 3hrs | 6hrs | 24hrs | 48hrs | 72hrs | 1week |
|---------------------------------------------------------|------|------|------|-------|-------|-------|-------|
| 1mg/mL                                                  | +++  | +++  | +++  | +++   | +++   | +++   | ++    |

**Figure S1.** Colloidal stability studies in Phosphate buffered saline (pH-7.4). The ‘+++’ indicates good colloidal stability

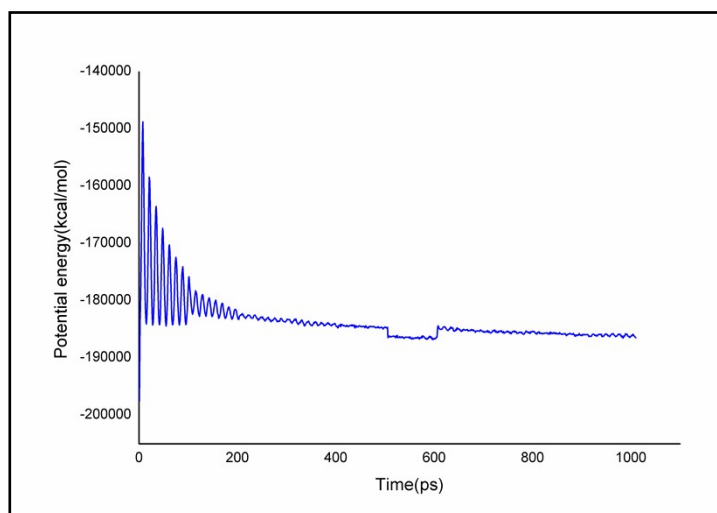

**Figure S2.** Time dependence of the potential energy (kcal/mol) during the simulation

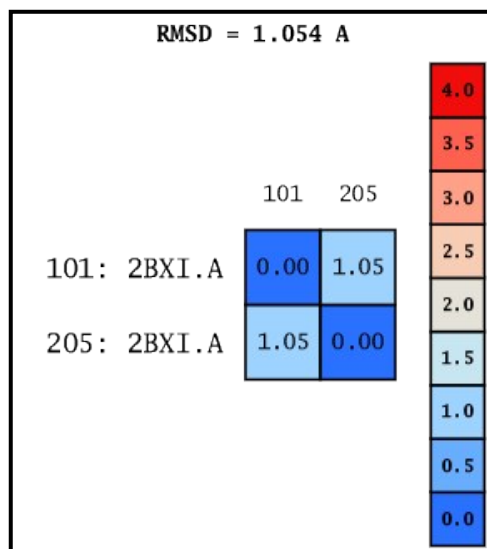

Supplement: c7nr09503a1.pdf [file c7nr09503a1.pdf]
